# Supplementary material for: The Veterinary Anti-Parasitic Selamectin Is a Novel Inhibitor of the Mycobacterium tuberculosis DprE1 Enzyme
Source: MDPI journal article supplement (doi:10.3390/ijms23020771), 2022-01-11
Supplement: s1 [file s1]

## **SUPPORTING INFORMATION**

### **The veterinary anti-parasitic selamectin is a novel inhibitor of the *Mycobacterium tuberculosis* DprE1 enzyme**

Ezquerro-Aznárez, J.M. *et al.*

**Table S1. Oligonucleotides used for DprE1 mutagenesis**

| <b>Name</b>     | <b>Sequence</b>                             |
|-----------------|---------------------------------------------|
| DprE1 C394A For | CGATCCCGGGCTGGAACGTGGCCGTGGACTTCCCGATCAAGG  |
| DprE1 C394A Rev | CCTTGATCGGGAAGTCCACGGCCACGTTCCAGCCCCGGGATCG |
| DprE1 C394G For | CGATCCCGGGCTGGAACGTGGGCGTGGACTTCCCGATCAAG   |
| DprE1 C394G Rev | CTTGATCGGGAAGTCCACGGCCACGTTCCAGCCCCGGGATCG  |
| DprE1 C394S For | GATCCCGGGCTGGAACGTGTCCGTGGACTTCCCGATCAAGG   |
| DprE1 C394S Rev | CCTTGATCGGGAAGTCCACGGACACGTTCCAGCCCCGGGATC  |
| DprE1 L282F For | CGCCGCAACTGCTCACGTTTCCGGACATCT              |
| DprE1 L282F Rev | AGATGTCCGGAAACGTGAGCAGTTGCGGCG              |
| DprE1 L282V For | CGCCGCAACTGCTCACGGTGCCGGACATCT              |
| DprE1 L282V Rev | AGATGTCCGGCACCGTGAGCAGTTGCGGCG              |

**Table S2. Oligonucleotides used for *M. smegmatis* recombineering.** Point mutations introduced with mutagenic oligos are highlighted

| Name        | Sequence                                                                                                     |
|-------------|--------------------------------------------------------------------------------------------------------------|
| rpsL+       | GCGACCTTCCGGAGCGCCGAGTTCGGCTTCCTCGGAGTGGTGGTGT<br>AAACGCGCGTGCACA                                            |
| L282F       | AGCTGCAGAAGGATCCACTGAAATTCGATGCGCCGCAACTGCTCA<br>CGTTTCCGGACATCTTCCCGAACGGCCTGGCCAACAAGTTCACGTT<br>CATGCCGAT |
| L282V       | AGCTGCAGAAGGATCCACTGAAATTCGATGCGCCGCAACTGCTCA<br>CGCTTCCGGACATCTTCCCGAACGGCCTGGCCAACAAGTTCACGTT<br>CATGCCGA  |
| dprE1-seq-F | GTGAGCCTGGACCAGTTGATGAAAGC                                                                                   |
| dprE1-seq-R | TACAGCCTGCCACCGAACTCC                                                                                        |

|     |                                                               |     |
|-----|---------------------------------------------------------------|-----|
| Mab | MARASGLCHRPDCDSHQFHRPARGDLPNPLSRYAQLPMTTPKSELPLTPRALTGFGRTA   | 60  |
| Mav | -----MSSTDPLITPARLTGFGRTA                                     | 20  |
| Msm | -----MGAV--PSLTMSTTEFPPTTKRLMGWGRTA                           | 28  |
| Mtb | -----MLSVGATTATRLTGWGRTA                                      | 20  |
| Mbo | -----MLSVGATTATRLTGWGRTA                                      | 20  |
| Mka | -----MSSNASSTTPTRLTGWGRTA                                     | 20  |
|     | . * * *:****                                                  |     |
|     |                                                               |     |
| Mab | PTVAHVLPDQVIAEAVRQVADASSHSPAHLRRGIVARGLGRSYGDHACNGGGIVVDM     | 120 |
| Mav | PSVAQVLRTRDPEVIAKAVARVADSGH---SKGRGVIARGLGRSYGDNAQNGGGLVIDM   | 76  |
| Msm | PTVASVLSTSDPEVIVRAVTRAAEE-----GGRGVIARGLGRSYGDNAQNGGGLVIDM    | 81  |
| Mtb | PSVANVLRTPDAEMIVKAVARVAESG-----GGRGAIARGLGRSYGDNAQNGGGLVIDM   | 74  |
| Mbo | PSVANVLRTPDAEMIVKAVARVAESG-----GGRGAIARGLGRSYGDNAQNGGGLVIDM   | 74  |
| Mka | PSVADVLRTPDPEVIAKAVARAAS-----GARGVIARGLGRSYGDNAQNGGGLVIDM     | 73  |
|     | *,** ** * * :*,. ** :. *: ** :*****: * *****: **              |     |
|     |                                                               |     |
| Mab | TPLKRVHSISAETAVADVVDAGVSLDQLMKAALPFGLWVPVLPGTRQVTVGGAIGSDIHGK | 180 |
| Mav | TGLNRIHSISADTRLVDVDAGVSLDQLMKAALPFGLWVPVLPGTRQVTVGGAIACDIHGK  | 136 |
| Msm | PALNRIHSIDSGTRLVDVDAGVSLDQLMKAALPHGLWVPVLPGTRQVTVGGAIGCDIHGK  | 141 |
| Mtb | TPLNTIHSIDADTKLVDIDAGVNLDQLMKAALPFGLWVPVLPGTRQVTVGGAIACDIHGK  | 134 |
| Mbo | TPLNTIHSIDADTKLVDIDAGVNLDQLMKAALPFGLWVPVLPGTRQVTVGGAIACDIHGK  | 134 |
| Mka | SGLNNIHSISADTKLADVVDAGVNLDQLMKAALPFGLWVPVLPGTRQVTVGGAIACDIHGK | 133 |
|     | *: :***.: * :. *:***.*****.*****.*****.*****                  |     |
|     |                                                               |     |
| Mab | NHHSAGSFGNHVLSMDLLMADGEVHTITPDGP---ASELFWATVGGNGLTGIVVRARIAM  | 237 |
| Mav | NHHSAGSFGNHVRSMELLMDAGTVRTITPDGPDASDAELFWATVGGNGLTGIVLRATIAM  | 196 |
| Msm | NHHSAGSFGNHVRSMELLTANGEVRHLTPAGP---DSDLFWATVGGNGLTGII LRATIEM | 198 |
| Mtb | NHHSAGSFGNHVRSMDLLTADGEIRHLTPTGE---DAELFWATVGGNGLTGII MRATIEM | 191 |
| Mbo | NHHSAGSFGNHVRSMDLLTADGEIRHLTPTGE---DAELFWATVGGNGLTGII MRATIEM | 191 |
| Mka | NHHSAGSFGNHVRSMDLLLANGEVRRLSPDGD---EAELFWATVGGNGLTGII LRATIEM | 190 |
|     | ***** **:* *.* :: :.* * :*****: ** * *                        |     |
|     |                                                               |     |
| Mab | TRTETAYFIADGVATRDLDETIADVHQDGTEDNYTYSSAWFDLINPPPKLGRAAVSRGSLA | 297 |
| Mav | TPTETAYFIADGVATKDLDETVAVHLDGSEADYTYSSAWFDLISPPPKLGRAAVSRGSLA  | 256 |
| Msm | TPTETAYFIADGDVTGSLDETI AFHSDGSEANYTYSSAWFDAISKPPKLGRAAISRGSLA | 258 |
| Mtb | TPTSTAYFIADGDVTASLDETI ALHSDGSEARYTYSSAWFDAISAPPKLGRAAVSRGRLA | 251 |
| Mbo | TPTSTAYFIADGDVTASLDETI ALHSDGSEARYTYSSAWFDAISAPPKLGRAAVSRGRLA | 251 |
| Mka | TPTETAYFIADGDVTATLDETI ALHSDGSEADYTYSSAWFDAISAPPKLGRAAISRGSLA | 250 |
|     | * *.***** . * *****:.* * *: * ***** * . *****:*** **          |     |

|     |                                                                                |     |
|-----|--------------------------------------------------------------------------------|-----|
| Mab | KLDQLPPKLAKDPLKFSAPQLPG <b>L</b> PDLPVNFMIKPSLMAIGEA <b>F</b> YRMSGNYQGKIVNLT  | 357 |
| Mav | RLDQLPKKLAKNPLKFDAPQLLT <b>V</b> PDVFPVSAMNKLSFMAIGEV <b>Y</b> RLGGTYTGKVMNLS  | 316 |
| Msm | KLDQLPSKLQKDPLKFDAPQLLT <b>L</b> PDIFPNGLANKFTFMPIGELWYRKSGTYRNKVQNLT          | 318 |
| Mtb | TVEQLPAKLRSEPLKFDAPQLLT <b>L</b> PDVFPNGLANKYTFGPIGELWYRKSGTYRGKVQNLT          | 311 |
| Mbo | TVEQLPAKLRSEPLKFDAPQLLT <b>L</b> PDVFPNGLANKYTFGPIGELWYRKSGTYRGKVQNLT          | 311 |
| Mka | RLEQLPTKLQRNPLKFDAPQLLT <b>F</b> PDVFPNGLANKYTFGPIGELWYRKSGTYRGKIQNLT          | 310 |
|     | : : *** ** : **** . **** . ** : ** . * : : *** : ** . * . * : ** :             |     |
| Mab | QFYHMLDITGWQ <b>Y</b> AYGPAGFAQHQFLVPPDALEEFKGIIRWIQTQGGYSALNVFKLFGP           | 417 |
| Mav | QFYHMLDLVSGWNNAYGPRGFAQHQFLVPPDAMDEFKAIIRWIQTRGHYSALNVFKLFGP                   | 376 |
| Msm | QFYHPLDMFGEWNRAYGSAGFLQYQFVVPTEAVEEFKSIIVDIQRSGHYSFLNVFKLFGP                   | 378 |
| Mtb | QFYHPLDMFGEWNRAYGPAGFLQYQFVIPTAEVDEFKKIIGVIQASGHYSFLNVFKLFGP                   | 371 |
| Mbo | QFYHPLDMFGEWNRAYGPAGFLQYQFVIPTAEVDEFKKIIGVIQASGHYSFLNVFKLFGP                   | 371 |
| Mka | QFYHPLDMFGEWNRAYGPAGFLQYQFVIPTAEVDEFKKIIRDIQASGHYSFLNVFKLFGP                   | 370 |
|     | **** ** : * : *** ** * : ** : * : : **** ** ** * : ** *****                    |     |
| Mab | GNKAPLSFPMKGWNVAMDFPNKPGVNEFLNELDRNAMEFGGRVYTA <b>K</b> DSRVSAEKFHRMY          | 477 |
| Mav | GNRAPLSFPMAGWNVAMDFPNKPGVNEFLNELDRRVLQFGGRVYTA <b>K</b> DSRTNAETFHAMY          | 436 |
| Msm | GNQAPLSFPPIPGWNCVDFPIKAGLHEFVTELDRRVLEFGGRLYTA <b>K</b> DSRTTAETFHAMY          | 438 |
| Mtb | RNQAPLSFPPIPGWNCVDFPIKDGLGKFVSELDRRVLEFGGRLYTA <b>K</b> DSRTTAETFHAMY          | 431 |
| Mbo | RNQAPLSFPPIPGWNCVDFPIKDGLGKFVSELDRRVLEFGGRLYTA <b>K</b> DSRTTAETFHAMY          | 431 |
| Mka | GNRAPLSFPPIPGWNCVDFPIKAGLNEFVSELDRRVLEFGGRLYTA <b>K</b> DSRTTAETFHAMY          | 430 |
|     | * : ***** : *** : . : *** * * : : * : . *** . * : : ***** : ***** . * . * ** * |     |
| Mab | PRVDEWIATRRKADPHGVFASDMARRLELL                                                 | 507 |
| Mav | PRIDEWIAVRRKVDPTGVFASDMARRLELL                                                 | 466 |
| Msm | PRIDEWIRIRRSVDPDGVFASDMARRLQLL                                                 | 468 |
| Mtb | PRVDEWISVRRKVDPLRVFASDMARRLELL                                                 | 461 |
| Mbo | PRVDEWISVRRKVDPLRVFASDMARRLELL                                                 | 461 |
| Mka | PRIDEWIAVRRKVDPLRVFASDMARRLELL                                                 | 460 |
|     | ** : ***** ** . * ** ***** : **                                                |     |

**Figure S1. Sequence alignment of mycobacterial DprE1.** Residues predicted to be relevant for selamectin binding to DprE1 are highlighted in yellow (Leu275 is shown in red) *Mab*: *Mycobacterium abscessus*; *Mav*: *Mycobacterium avium*; *Msm*: *Mycobacterium smegmatis*; *Mtb*: *Mycobacterium tuberculosis*; *Mbo*: *M. bovis*; *Mka*: *M. kansasii*

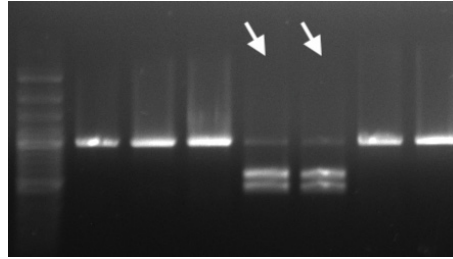

**Figure S2. Screening of *M. smegmatis* recombinants for point mutations.** Following transformation with the mixture of mutagenic oligonucleotides targeting both *dprE1* and *rpsL*, colonies isolated on streptomycin-containing were screened for the presence of point mutations in *dprE1*. A 944 bp fragment of *dprE1* was amplified by PCR, and then digested with *Kpn2I*. Wild-type *M. smegmatis* shows the undigested 959 bp product, while mixed populations (white arrows) show the undigested fragment and the two digestion products (525 and 419 bp). Left lane: Gene Ruler 100 bp Plus Ladder (ThermoFisher Scientific).

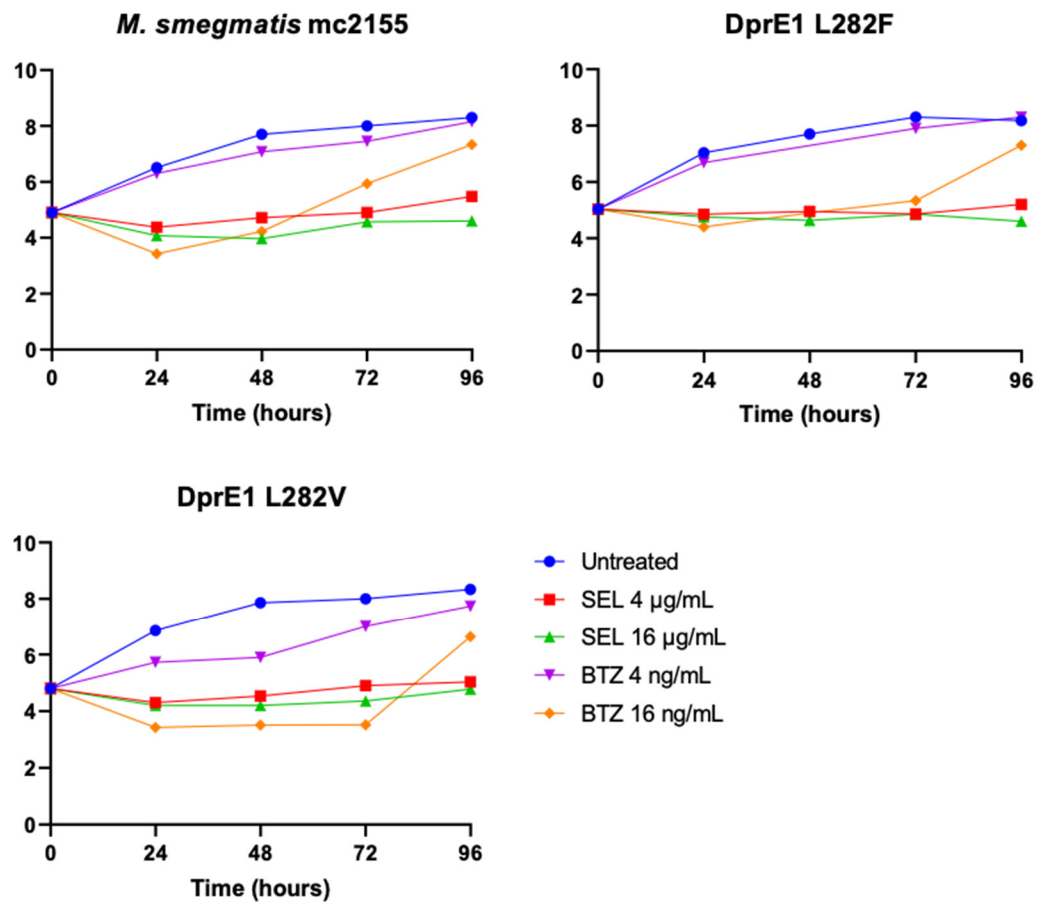

Figure S3. Time-kill kinetics of *M. smegmatis* DprE1 point mutants.
